# Supplementary material for: Chemistry students’ conceptual difficulties and problem solving behavior in chemical kinetics, as a component of an introductory physical chemistry course
Source: publisher site journal article supplement (doi:10.1515/cti-2022-0005), 2022-07-13
Supplement: Supplementary file 1 [file j_cti-2022-0005_suppl.docx]

**Supplementary Information**

**APPENDIX 1**

**An Example of an Examination Paper with the Chemical Kinetics Part[[1]](#footnote-1)⊥**

**NOTE**: *The topics of chemical kinetics scored 40 (in other cases 45) out of a maximum of 100 marks (plus 20 bonus marks for this particular paper). The remaining 60 (or 55% marks respectively) were assigned to the electrochemistry part of the examination.*

**PART II: SECTION ON CHEMICAL KINETICS**

K1. The following general reaction is given 2H2O2(aq) → 2H2O (aq) + O2 (g)

(a) Define the reaction rate in terms of H2O2, in terms of O2 (g) and in terms of the extent of reaction variable ξ.

(b) Write the formula that expresses the experimental rate law for this reaction.

*(3 + 5 = 8 marks)*

K2. The Michaelis-Menten equation *d*[*P*]/*dt* = *k*b[E]ο[S]/(*K*M +[S]) is given. What do E and S represent? Write down the Michaelis-Menten mechanism (elementary reactions only). It is also given that the rate increases with [S]. What is the rate value at the limit when [S] → ∞? Is this the maximum reaction rate? *(1 + 1 + 9 + 1 = 12 marks)*

FROM THE NEXT TWO ITEMS K3 & K4 ANSWER ONLY ONE ITEM OF YOUR CHOICE

K3 (*Atkins, 1989, Problems 28.23 and 28.24, with modifications, for instance the initial information of problem 28.23 and the last part of Problem 28.24 were not included in the problem as it was set in the examination*). The following kinetic data are given for the reaction A + B → P, where Α = CH3-CH=CH2 (propene), B: HCl, P: CH3-CH-Cl-CH3 (2 chloropropane). Initially [P] = 0. Show that after a relatively short time δ*t* from the beginning of the reaction, δ[P]/[A] = *k*[A]*m*-1[B]*n*δ*t*(and similarly δ[P]/[Β] = *k*[A]*m*[B]*n*-1 δ*t*), where *m* and *n* are the orders of the reaction with respect to

Α and Β respectively. In a series of experiments, it was found that with [B] constant the ratio δ[P]/[Α] is constant. Moreover, with [Α] constant, the ratio δ[P]/[Β] changes as follows: for pressure values of Β (hydrogen chloride) equal to 5 and 10 atm, the ratio δ[P]/[Β] increased from zero to 0.01 and to 0.05 respectively. Show that the experimental rate law is δ[P]/δ*t* = *k*[A][B]3 = *k*[CH3-CH=CH2][HCl]3. Then show that the following mechanism is consistent with the above experimental rate law:

2 HCl
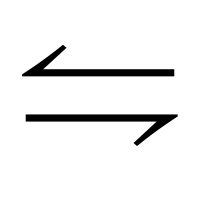
 (HCl)2 (pre-equilibrium 1; rate constants: *k*1 and k-1)

HCl+ CH3-CH=CH2
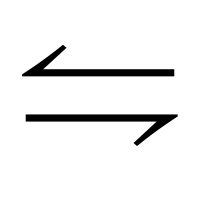
intermediate complex (pre-equilibrium 2; rate constants: *k*2 and

*k*-2)

(HCl)2 + intermediate complex → CH3-CH-Cl-CH3 +2HCl (slow step) (rate constant: *k*3)

*(20 marks + 10 bonus marks = 30 marks)*

K4 [*Based on Moore (1972, p. 405, also Problem 21, p. 418*)]. Refer to the steady-state approximation and the conditions for its validity. For the reaction 2NO(g) + O2(g) → 2NO2(g), apply this approach and derive the theoretical rate law for d[NO2]/dt in the case of the following reaction mechanism:

NO(g) + NO(g)
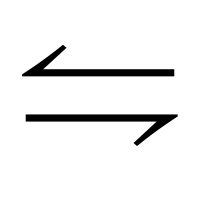
 N2O2(g) (fast equilibrium) (rate constants: *k*1 and k-1)

N2O2(g) + Ο2 → 2ΝΟ2(g) (slow) (rate constant: *k*2) *(10 + 10 = 20 marks)*

**APPENDIX 2**

**Examples and Comments οn More Demanding Examination Questions**

**NOTE**: In all the following cases, the data for the problems were given and the outcomes/goals were familiar/specified (Johnstone, 1993).

***Half-life of a Reaction***

- The half-life for the (1st-order) radioactive decay of iodine-131 (131I) is approximately 8 days. This isotope is used for diagnostic and therapeutic purposes in diseases of the thyroid gland, but, due to the β radiation it emits, it is generally dangerous for the body. Assume that 1.00 mg 131I was absorbed by a man’s body. How much of this radioactive element will remain in the body after 30 days if there is no loss due to metabolism?

***Theoretical Rate Law***

- The mechanism of a reaction (in aqueous solution) is as follows:

HOOH+I− → HOI + OH− (*k*1) (slow) (a)

HOI + I−→ OH− + I2 (*k*2) (fast) (b)

OH− + H+ → H2O (*k*3) (fast) (c)

A) What is the overall reaction?

B) What are the intermediates?

C) Calculate the theoretical rate law with respect to the reactant HOOH (hydrogen peroxide) and justify why this is the correct theoretical rate law.

D) Based on the theoretical rate law, what is the total order of the reaction?

E) Apply the steady state approximation for the intermediate HOI to find the theoretical rate law with respect to product I2. Justify why we can apply the steady state approximation to the intermediate HOI.

*Comment*: Question (A) here was found to be particularly difficult. To arrive at the answer, one needs to first spot the intermediate(s), which should not appear in the overall stoichiometric equation; these are produced in an elementary reaction and consumed in another. Two intermediates occur here: HOI and OH−. HOI entersonceas a product in eq. (a) and once as a reactant in eq. (b). OH− entersas a product in eqs. (a) and (b) and as a reactant in eq. (c). Now because there are two OH−s appearing as a product [eqs. (a) and (b)], but only one OH− appearing as a reactant [eq. (c)], we double eq. (c) and add all equations together to arrive at the overall stoichiometric equation:

| HOOH + 2I− + 2H+ → 2H2O + I2 (or equivalently: H2O2 + 2HI → 2H2O + I2) |
| --- |

*Mathematical Misconceptions in Deriving the Theoretical Rate Law from a Mechanism*

*Example problem* (Moore, 1972, problem 20, pp. 417-418, with modifications – for instance, the result is not supplied here, while the final part is different): The following is a possible mechanism for the reaction C2H6(g)+H2(g) → 2CH4(g):

C2H6
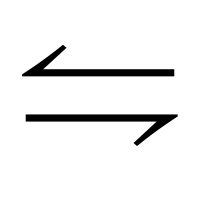
 2CH3 (rate constants: *k*1 & *k*-1) (1)

CH3+H2 → CH4+H (rate constant: *k*2) (2)

H+C2H6 → CH4+CH3 (rate constant: *k*3) (3)

Derive the theoretical rate law, assuming that for the first reaction the pre-equilibrium condition applies, while the intermediate H is in a steady state. Also discuss which elementary reaction(s) must be relatively fast, which must be relatively slow, so that the above conditions/approximations can apply.

The correct solution is as follows: First, we write down the theoretical rate law for the product CH4:

*d*[CH4]/*dt* = *k*2[CH3][H2] + *k*3[H][ C2H6] (4)

(Note that only concentrations of reactants enter the rate law.)

The theoretical rate law requires the use of all elementary equations in which the product CH4 enters, that is, the elementary reactions (2) and (3). Now, in both (2) and (3), CH4 is a product, so the corresponding two terms that enter eq. (4) have a positive (+) sign.

Eq. (4) contains the concentrations of two intermediates, namely CH3 and H, so we must use appropriate formulas to replace them. The data of the problem allow the application of the steady-state approximation to [H]:

*d*[H]/*dt* = 0 = *k*b[CH3][H2] – *k*c[H][C2H6] (5)

from which we get:

[H] = (*k*2/*k*3)[CH3][H2)] / [C2H6] (6)

Replacing eq. (6) into eq. (4), we obtain:

*d*[CH4]/*dt* = *k*2[CH3][H2] + *k*3(*k*2/*k*3){[CH3][H2]] / [C2H6]}[C2H6] =

*k*2[CH3][H2] + *k*2[CH3][H2] = 2*k*2[CH3][H2] (7)

We are now only left with the intermediate CH3, which can be obtained by applying the pre-equilibrium condition to eq. (1):

*K* = *k*1/*k*-1 = [CH3]2 / [C2H6] (where *K* is the equilibrium constant), from which we get

[CH3] = (*k*1/*k*-1)1/2 [C2H6]1/2 (8)

Replacing [CH3] from eq. (8) into eq. (7), we get the required solution:

| *d*[CH4]/*dt* = 2*k*2(*k*1/*k*-1)1/2 [C2H6]1/2 [H2] = 2*k*2(*Κ*)1/2 [C2H6]1/2 [H2] (9) |
| --- |

The problem alsoasks which elementary reaction(s) must be relatively fast, which must be relatively slow, so that the above conditions/approximations apply. For the pre-equilibrium condition to apply, the consumption of the product CH3 in eq. (1) through the elementary reaction (2) must be slow [otherwise, equilibrium (1) would have been continuously disturbed]. On the other hand, for the steady-state approximation to apply for H, H must be produced slowly at elementary reaction (2) (which is the case, since reaction (2) must be slow) and be consumed quickly through elementary reaction (3). (In this way the concentration of H remains constant during most of the reaction, and so *d*[H]/*dt* = 0.) The conclusion is that step (2) in the reaction mechanism must be the rate-determining step. This is evident from eq. (9), which contains *k2* but not *k*3.

It follows from the above solution that this was a highly demanding problem, both in terms of algebraic manipulations and conceptually, and this justifies the moderate achievement in this problem: *M* = 49.8%, SD = 25.5 (*N* = 31). Apparently, the cumbersome mathematics involved acts as an impediment for most students, who either make mistakes or abandon the mathematical procedures, leaving the problem unfinished. It should also be pointed out that for the large majority of students, the conceptual argumentation concerning the conditions for the application of the two conditions appears to be very complex, and hence most students did not deal with this part of the problem.

*Comments*: Some students define the reaction rate with respect to CH4 using only one elementary reaction:

*d*[CH4]/*dt* = *k*2[CH3][H2] [from eq. (2)] or (10)

*d*[CH4]/*dt* = *k*3[H][C2H6] [from eq. (3)] (11)

Both eqs. (10) and (11) are wrong for the following reasons: First, the theoretical rate law dictates the use of all elementary equations in which the product CH4 enters, that is, the elementary reactions eqs. (2) and (3), and as a result, eqs. (10) and (11) are both incomplete/wrong. The correct theoretical rate law is given by eq. (4). Note that Eq. (10) contains on the right-hand side only concentrations of reactants, so it could be assumed as the solution of the problem, but apparently this solution is wrong.

A second error/misconception that some students make is the following: The left sides of eqs. (5) and (6) are equal, hence the right sides must be equal too (but this is a wrong deduction – see below):

*k*2[CH3][H2] = *k*3[H][ C2H6] (12)

Solving eq. (12) for the intermediate H, we get

[H] = *k*2[CH3][H2] / *k*3[C2H6] (13)

Replacement of [H] from eq. (13) into the wrong eq. (11), leads to:

*d*[CH4]/*dt* = (*k*2/*k*3){[CH3][H2] / [C2H6]}[C2H6] = *k*2[CH3][H2] (14)

Eq. (14) [which is the same as the wrong eq. (5)] cannot then be the correct solution for the rate of the reaction. We observe a fundamental misconception here, which is due to applying an erroneous mathematical argument (left sides are equal, hence the right sides must be equal too) to a physicochemical problem, that is, using the equality given by eq. (12). Finally, note that, in the wrong procedure we followed, we have not used either the pre-equilibrium condition or the steady-state approximation.

It is notable that, with the passing of time, the above misconceptions [regarding eqs. (4), (10), and (11), (12)] were greatly reduced (they almost disappeared), because, at his lectures, the lecturer paid particular attention to the relevant issues.

**References**

Atkins, P. W. (1989). Physical chemistry, 3rd edn. Oxford, UK: Oxford, University Press.

Johnstone, Α. Η. (1993). Introduction. In C. Wood, & R. Sleet (Eds.), *Creative problem solving in chemistry* (pp. iv-vi). London, UK: The Royal Society of Chemistry.

Moore, W. J. (1972). Physical chemistry, 5th edn. Englewood Cliffs, NJ: Prentice-Hall.

1. ⊥ Set in September 2012. [↑](#footnote-ref-1)
